# Supplementary material for: Improvement of Obesity and Dyslipidemic Activity of Amomum tsao-ko in C57BL/6 Mice Fed a High-Carbohydrate Diet
Source: MDPI journal article supplement (doi:10.3390/molecules26061638), 2021-03-15
Supplement: s1 [file s1]

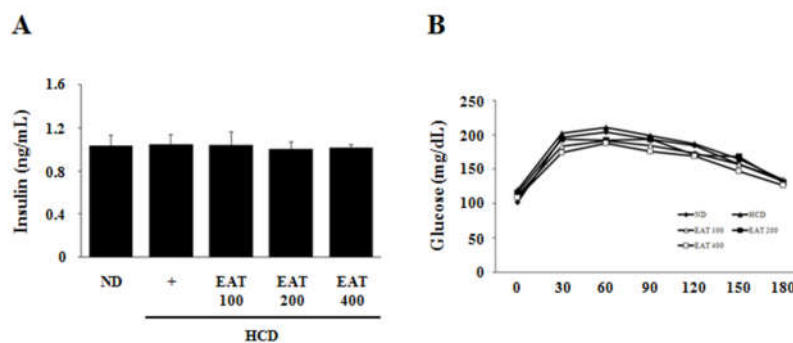

**Figure S1.** Effect of EAT on insulin level and glucose tolerance test in HCD-induced mice model. (A) At the end of the experiment, blood was collected from the abdominal vena cava and immediately centrifuged. Insulin level was determined using a mouse insulin ELISA kit. (B) After 12 h of fasting, a glucose solution was injected intraperitoneally (2 g/kg), and blood was collected from the tail vein at 0, 30, 60, 90, 120, 150, and 180 min. Blood glucose levels were measured using a glucometer.
